# Supplementary material
Source: publisher site journal article supplement (https://www.dovepress.com/article/332438)

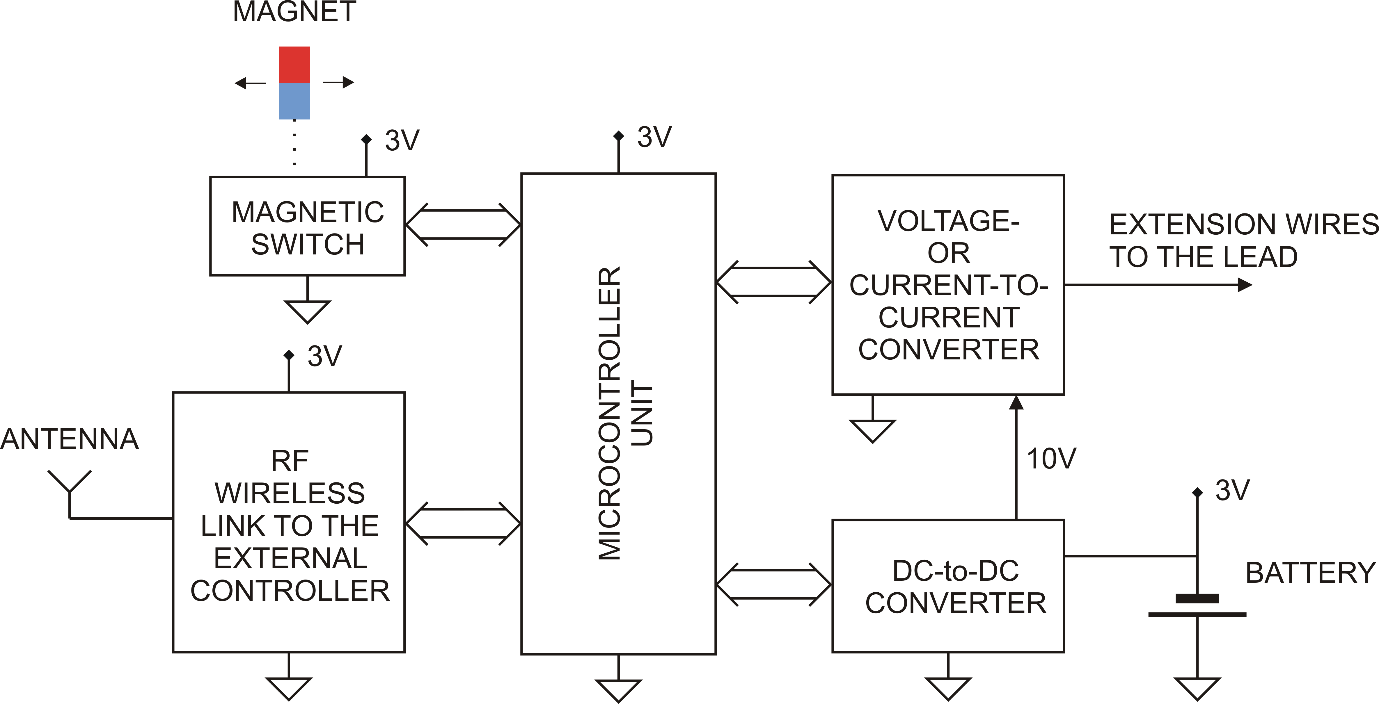


**Supplementary Figure 1.** Schematic drawing of the main circuit elements of the stimulator.

Supplement: Supplementary file 1 [file get_supplementary_file.php]
